# Supplementary material for: Dense phenotyping from electronic health records enables machine learning-based prediction of preterm birth
Source: Springer Nature journal article supplement (doi:10.1186/s12916-022-02522-x), 2022-09-27
Supplement: MOESM1 [file 23548908]

1 SUPPLEMENT:

2 **Dense phenotyping from electronic health records enables machine-learning-based**  
3 **prediction of preterm birth**

4

5 Abin Abraham<sup>1,2</sup>, Brian Le<sup>3</sup>, Idit Kosti<sup>3,4</sup>, Peter Straub<sup>1,5</sup>, Digna R. Velez-Edwards<sup>1,6,7</sup>, Lea K. Davis<sup>1,8,9</sup>, J.  
6 M. Newton<sup>7</sup>, Louis J. Muglia<sup>10</sup>, Antonis Rokas<sup>6,11</sup>, Cosmin A. Bejan<sup>6</sup>, Marina Sirota<sup>3,4</sup>, John A.  
7 Capra<sup>1,6,11,\*</sup>

8

9 \*Corresponding author: [tony@capralab.org](mailto:tony@capralab.org)

10

11 **Supplemental Figures**

12 **Supplemental Tables**

13 **Supplemental Methods**

14 Supplemental Figures  
15

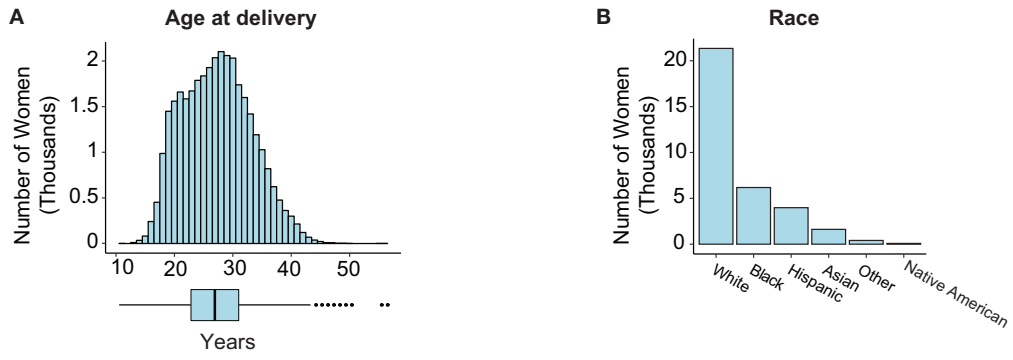

16  
17  
18 **Fig. S1. Distribution of maternal age at delivery and self- or third-party reported race.** (A) The distribution of  
19 age at first delivery in EHR (mean 27.3 years; 23.0–31.0 years, 25<sup>th</sup> and 75<sup>th</sup> percentiles). (B) Counts of women by  
20 self- or third-party reported race (White: 21,343; Black: 6,178; Hispanic: 3,979; Asian: 1,617; Other: 409; Native  
21 American: 84).  
22  
23

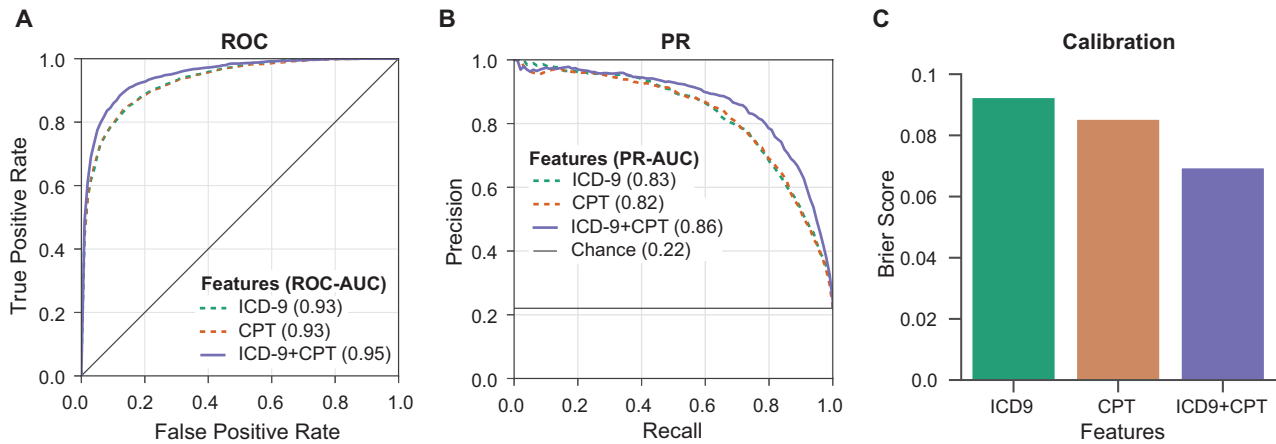

24  
25  
26  
27  
28  
29  
30  
31  
32  
33  
34  
35

**Fig. S2: Boosted decision trees trained on EHR billing codes accurately identify preterm births.** We trained and validated boosted decision trees on 80% of labeled pregnancies (preterm vs. non-preterm) from the EHR cohort (n=35,282, Fig. 1). We included both singletons and multiple gestations. We evaluated model performance on the held-out set using area under the ROC and precision-recall curves (ROC-AUC, PR-AUC) and Brier scores. EHR features used to ascertain delivery labels are excluded in training and evaluation of the models. **(A,B)** The boosted decision trees accurately classified deliveries by preterm birth status using only ICD-9 (green dashed line), only CPT (orange dashed line), and combined ICD-9 and CPT (solid purple) features present in a women’s EHR, (ROC-AUC $\geq$ 0.93, PR-AUC $\geq$ 0.86). Combining ICD-9 and CPT codes achieved the best performance. **(C)** The low Brier scores ( $\leq$ 0.092) indicate that the models are well calibrated.

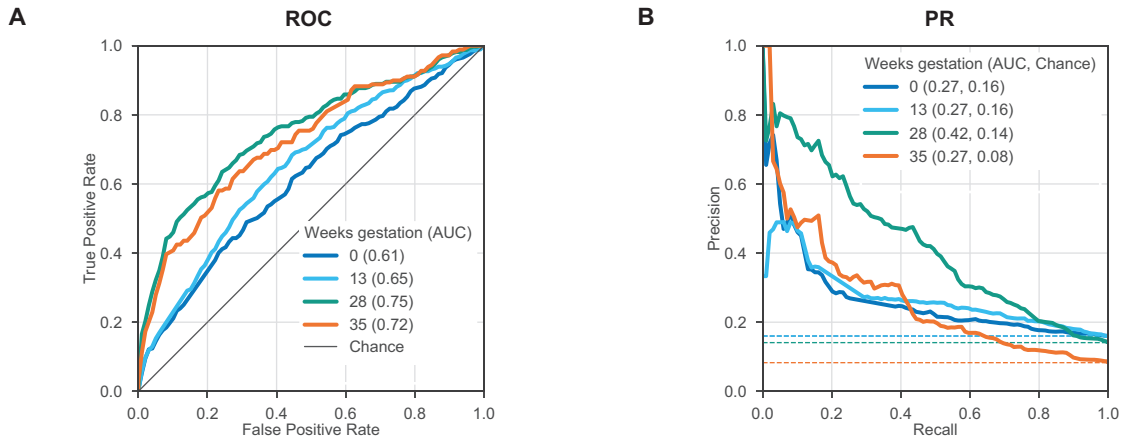

36 **Fig. S3: Machine learning can accurately identify preterm birth including singletons and multiple gestations.**  
 37 We trained models (boosted decision trees) on 80% of the corresponding cohort to predict the earliest delivery as  
 38 preterm or not-preterm (Methods). In contrast to the models presented in the main text (Fig. 2), these included  
 39 singleton and multiple gestations. Billing codes (ICD-9 and CPT) present before pregnancy (0, 13, 28, and 35 week  
 40 of gestation) were used to train models. The same cohort of women (training + held-out) was used to train and  
 41 evaluate across models but the sample size varied slightly ( $n = 11,843$  to  $10,799$ ) since women who already  
 42 delivered were excluded at each timepoint. **(A)** The ROC-AUC increased from conception at 0 weeks (0.61, dark  
 43 blue line) to 35 weeks of gestation (0.72, orange line) compared to a chance (black line). **(B)** The model at 28 weeks  
 44 of gestation achieved the highest PR-AUC (0.42). Chance (dashed lines) represents the preterm birth prevalence in  
 45 each cohort.

46  
 47  
 48

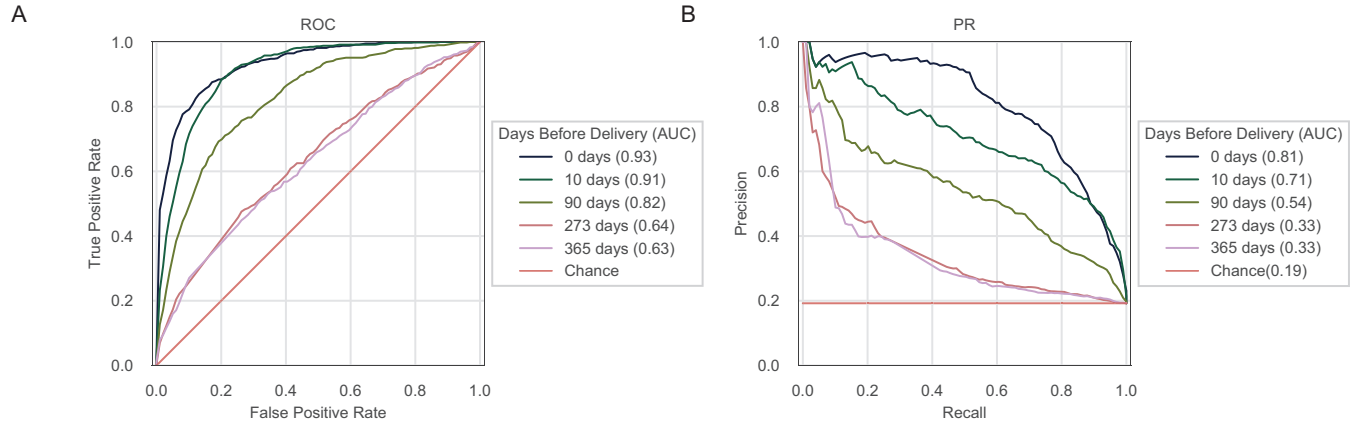

49  
50  
51  
52  
53  
54  
55  
56  
57

**Fig. S4: Preterm birth prediction increases at timepoints closer to the date of delivery at timepoints based on days before delivery.** (A) ROC and (B) PR curves for preterm birth prediction using billing codes (ICD-9 & CPT) at different timepoints defined from the date of delivery in the Vanderbilt cohort. Both singletons and multiple gestations are included. Chance for PR-AUC represent random prediction equal to the population prevalence of preterm birth. Model performance improves as the prediction is made closer to delivery. All models are trained and evaluated on the same cohort of women (n=15,481) and the performance reported is on the held-out set (20% of cohort).

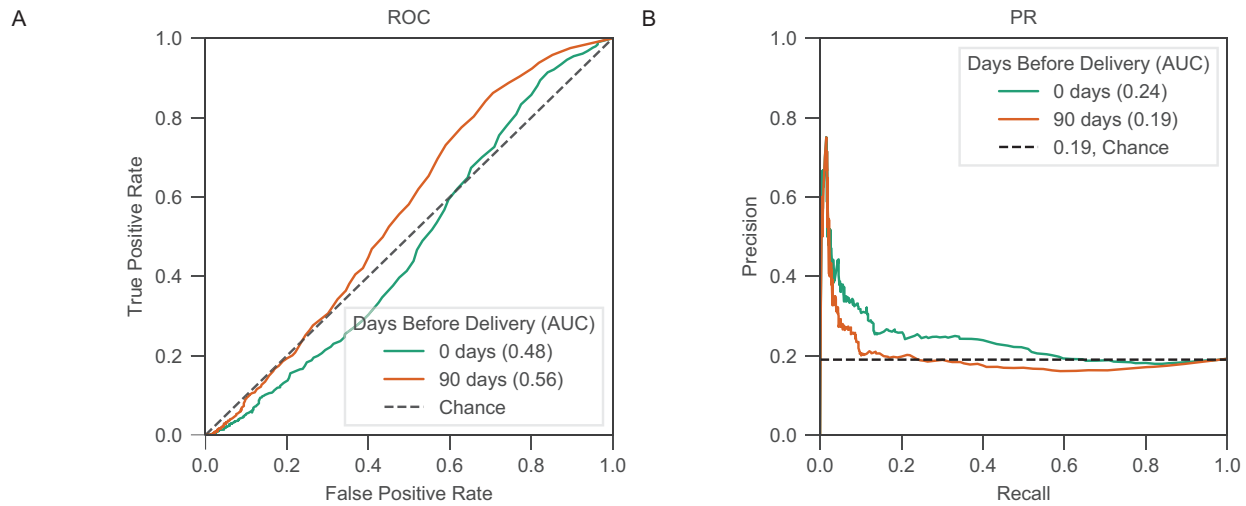

58 **Fig. S5: Preterm birth prediction is not driven by total number of billing codes.**  
 59 To evaluate whether the amount of contact with the healthcare system was driving the  
 60 performance of our machine learning classifiers, we assessed the discriminatory ability of the  
 61 total number of billing codes (ICD-9 or CPT) in a woman's EHR to predict preterm birth. We  
 62 include both singletons and multiple gestations. A simple classifier that used only the number of  
 63 total billing codes preset at 0 days (green) and 90 days (orange) before the first delivery in her  
 64 EHR, did not predict preterm birth well: **(A)** ROC-AUC = 0.56 and **(B)** PR-AUC = 0.19. The  
 65 cohort consisted of the held-out set at the specified timepoints with 3,096 women.  
 66

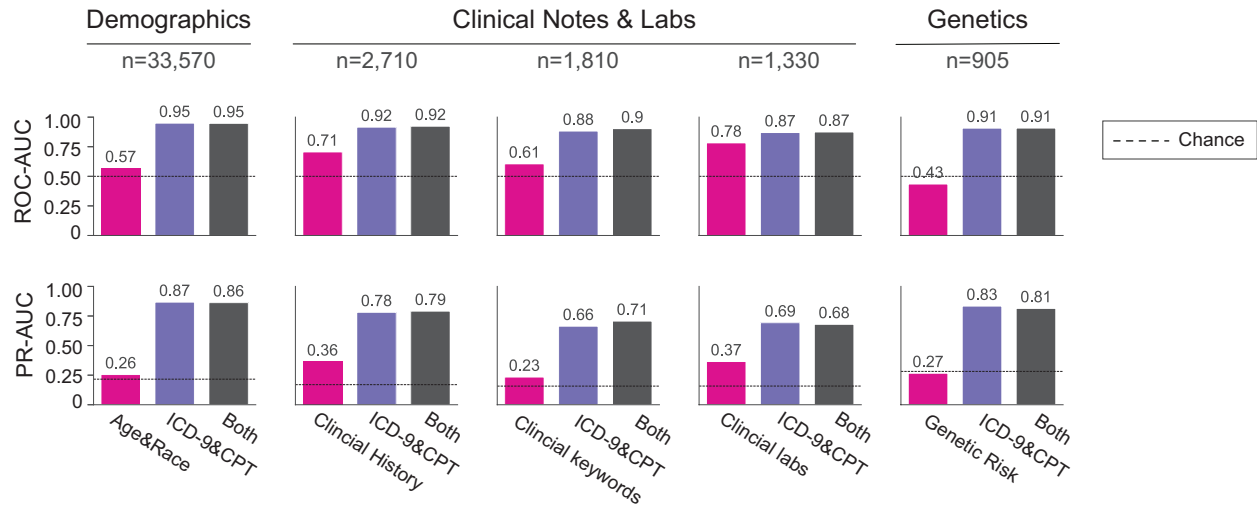

### MODELS

67  
68 **Fig. S6: Combining EHR features with billing codes does not improve model performance.** We evaluated how  
69 combining EHR features with billing codes could improve model performance. We used a similar framework as  
70 stated in Figure 3 but included billing codes and features before and after delivery instead of before 28 weeks of  
71 gestation. We also included multiple gestations instead of only including singleton pregnancies. EHR features are  
72 grouped in to sets of: demographic factors (age and race), clinical history (patient and familial comorbidities),  
73 clinical keywords (UMLS concept unique identifiers from obstetric notes), clinical labs, and genetic risk (polygenic  
74 risk score for preterm birth). We compared three models for each feature set: 1) using only the feature set being  
75 evaluated (pink), 2) using ICD-9 & CPT codes (purple), and 3) using the feature set combined with ICD-9&CPT  
76 codes (gray). For each feature set, we considered the subset of women who had at least one recorded value for the  
77 EHR feature and ICD&CPT codes. All three models for a given EHR feature set considered the same pregnancies,  
78 but there are differences in the cohorts considered across features set due to differences in data availability. Each of  
79 the three models (x-axis) and their ROC-AUC and PR-AUC (y-axes) are shown. Each of the additional EHR  
80 features performed worse than the billing code only model and did not substantially improve performance when  
81 combined with the billing codes. Of the other EHR features tested, clinical labs had the best predictive performance  
82 with PR-AUC of 0.37 and ROC-AUC of 0.78. Dotted lines represent chance of 0.5 for ROC-AUC and the preterm  
83 birth prevalence for PR-AUC. The total number of women (n) in each subset including the training and held-out set  
84 is given.  
85  
86  
87

88

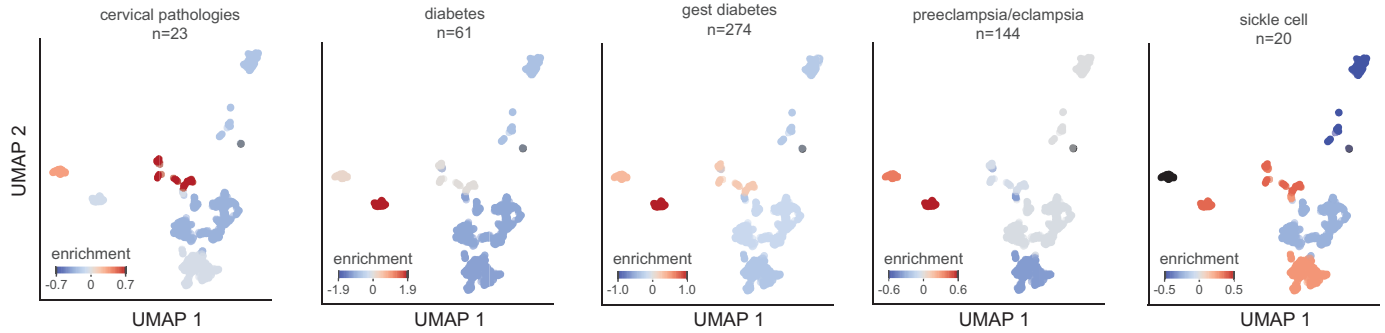

89

90

91

92

93

94

95

**Fig. S7: Enrichment of additional clinical risk factors in pregnancy cohort clusters.** We calculated enrichment ( $\log_{10}$  odds ratio) of several additional clinical risk factors (each panel) for each cluster derived from the feature importance matrix for the model predicting preterm birth at 28 weeks of gestation (Figure 5, Methods). These risk factors are enriched in different clusters. We report the total number of women in the delivery cohort at high risk for each clinical risk factor (n).



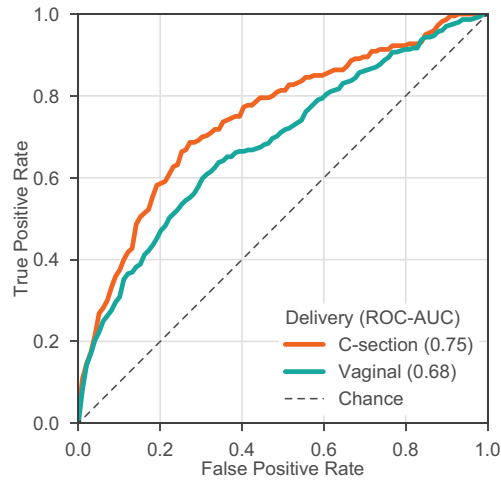

97

98

**Fig. S8: Preterm birth prediction accuracy is higher for cesarean-sections compared to vaginal deliveries.**

99

100 After stratifying the delivery cohort into cesarean-sections (n=5,475) and vaginal (n=15,487) deliveries, we trained a  
 101 model on each delivery type to predict preterm or not-preterm births. Multiple gestations were excluded. We trained  
 102 models using billing codes (ICD-9 and CPT) present before 28 weeks of gestation. ROC-AUC was higher for  
 103 cesarean-sections (0.75) compared to vaginal deliveries (0.68). This corresponds to the PR curves presented in Fig.  
 104 6A.

104

105

106

107

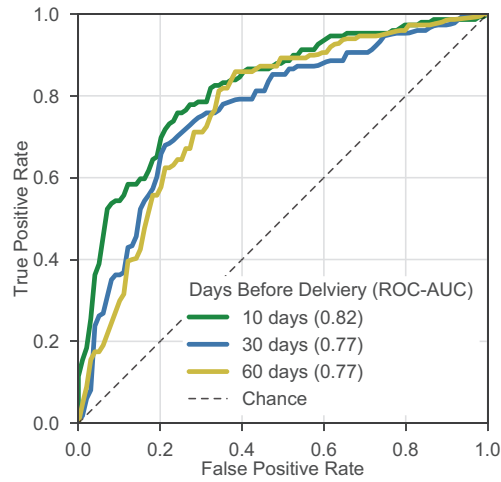

108  
 109  
 110  
 111  
 112  
 113  
 114  
 115  
 116  
 117

**Fig. S9: Models trained using billing codes can accurately predict risk of a second preterm birth.** For women with a history of preterm birth (n=1,416, Methods), we trained models using billing codes (ICD-9 and CPT) to predict a second preterm birth. Multiple gestations were excluded. For each model, only billing codes timestamped before the specified number of days before delivery are included. Models predicted a second preterm birth accurately with the highest and lowest ROC-AUC of 0.82 at 10 days and 0.77 at 60 days before delivery respectively. This corresponds to the PR curves presented in Fig. 6B.

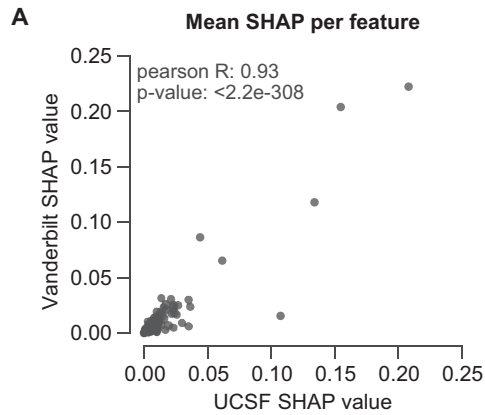

118  
119  
120  
121  
122  
123  
124  
125  
126  
127

**Fig. S10: Preterm birth model feature importance is similar in an external cohort.** A preterm birth prediction model trained at Vanderbilt was applied to an external UCSF cohort. Models were trained using ICD-9 codes present before 28 weeks of gestation at Vanderbilt on 16,857 of women and evaluated on a held-out set at Vanderbilt (n=4,215, gold) and UCSF cohort (n=5,978, blue). These models performed similarly (Fig. 7). **(A)** Feature importance was estimated by the mean absolute SHapley Additive exPlanation (SHAP) value per feature in each individual in each cohort (x and y-axes). The feature importance estimates have a high positive correlation between cohorts (Pearson  $r=0.93$ ,  $p<2.2e-308$ , two-tailed).

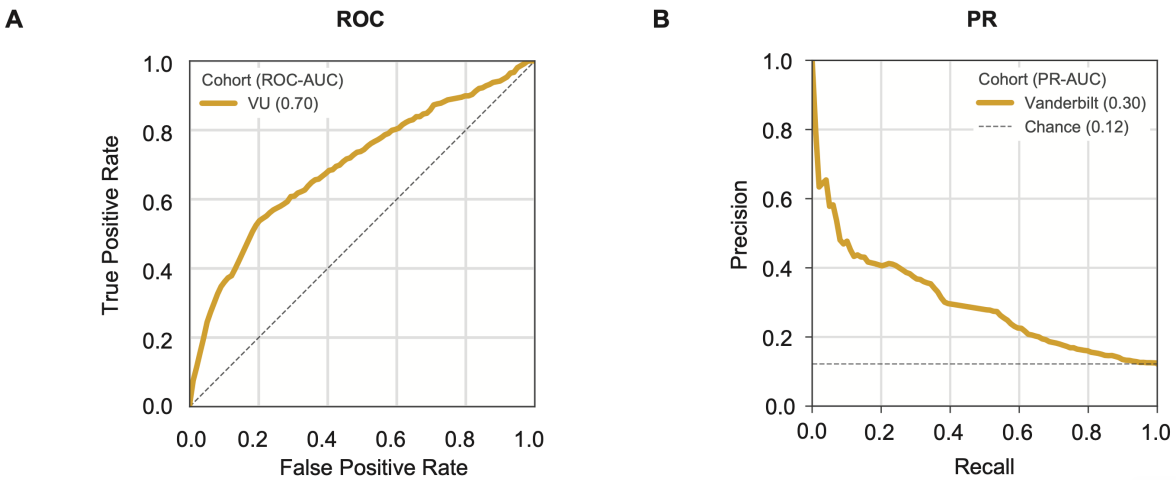

129  
130  
131  
132  
133  
134  
135  
136  
137

**Fig. S11: Logistic regression does not perform as well as gradient boosted decision trees for predicting preterm birth.** (A) ROC and (B) PR curve for a simple logistic regression model on the Vanderbilt cohort held-out set ( $n=4,215$ ). A logistic regression classifier was trained to predict preterm birth using only the top 15 features derived from the gradient boosted trees model (Figure 7C). The classifier was trained on the same Vanderbilt cohort ( $n=16,857$ ) as the Vanderbilt-28wk model. Performance for the full gradient boosted decision tree model is given in Figure 7A,B. Dashed lines represent expected performance of a classifier that makes random predictions.

Stratified By Race Model Performance

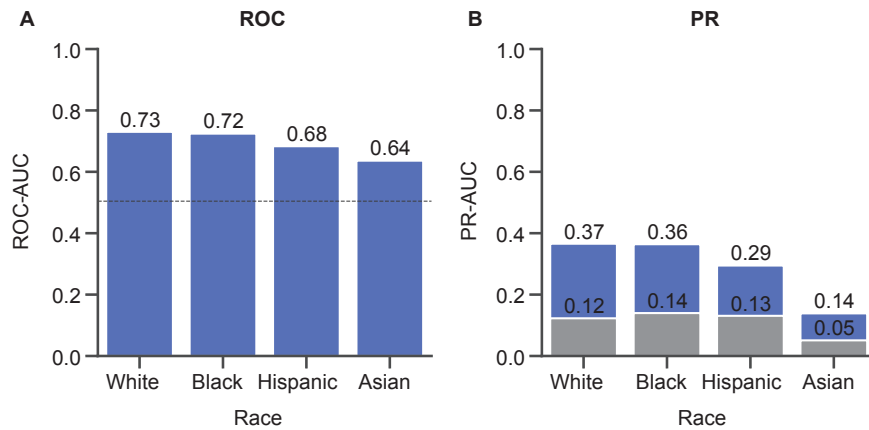

138  
139  
140  
141  
142  
143  
144  
145  
146  
147  
148

**Fig. S12: Model performance varies when stratified by race.** Using the Vanderbilt-28wk model based on ICD-9 codes before 28 weeks of gestation, we evaluated the performance using (A) ROC-AUC and (B) PR-AUC stratified by race (x-axis) on the held-out set. The dashed line in (A) represents chance at AUC=0.5. The gray bars in (B) represent the preterm birth prevalence within each racial category. The number of individuals in each racial category within the held-out set are as follows: White=2,566, Black=694, Hispanic=535, and Asian=236.

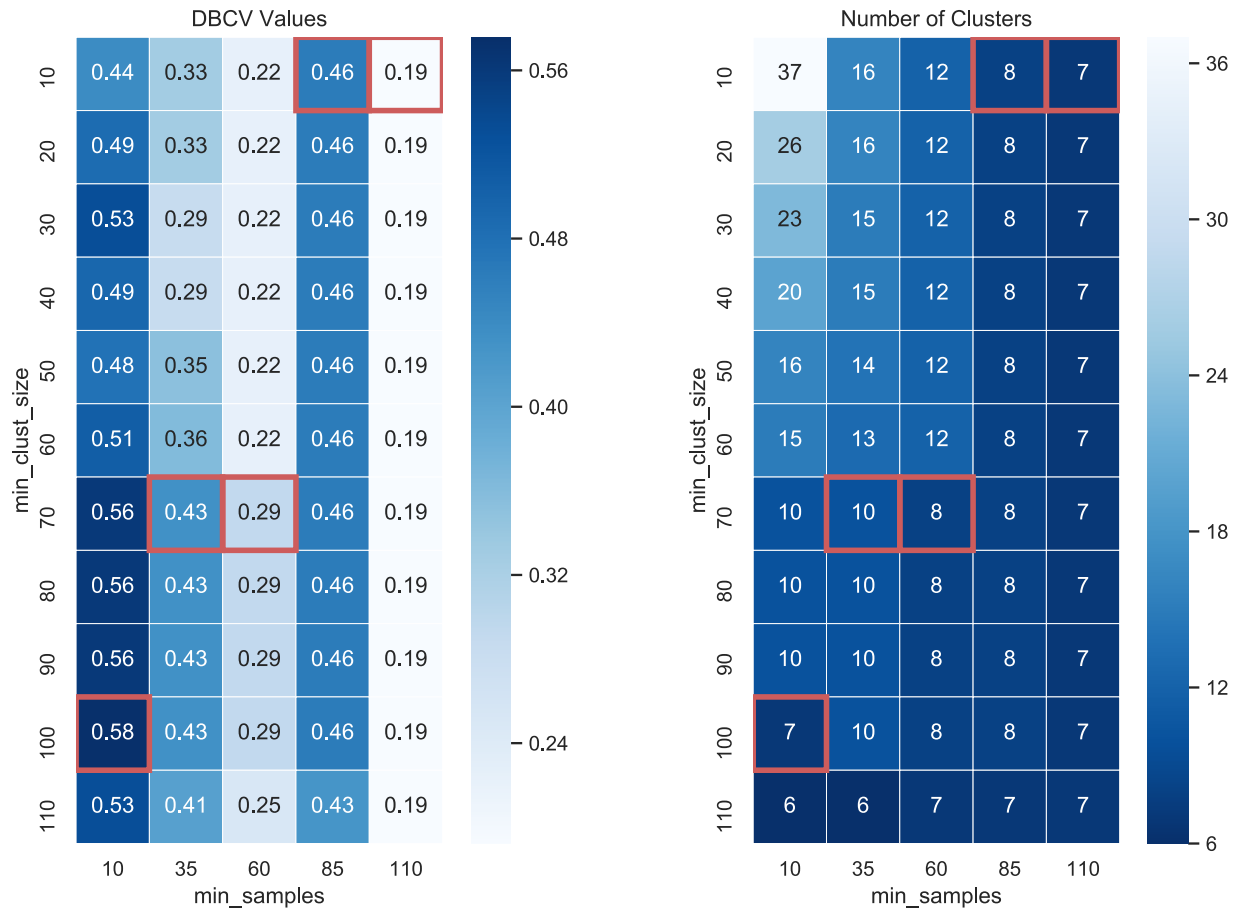

150  
151  
152  
153  
154  
155  
156  
157  
158  
159  
160

**Fig. S13: Density based cluster validity score across hyper-parameters space for HDBSCAN clustering of deliveries by feature importance.** To identify the optimum number of clusters using HDBSCAN on the billing-code-based model at 28 weeks gestation in the held-out set, we explored two hyperparameters: minimum number of individuals in each cluster ('min\_clust\_size', y-axis) and threshold for determining outlier individuals who do not belong to a cluster ('min\_samples', x-axis). The left heatmap represents cluster validity measured with the density-based cluster validity (DBCV) score with higher DBCV (darker blue) scores indicating more distinct clusters. The right heatmap displays the number of clusters (higher blue == higher number of clusters) for the pair of hyperparameters. Cells outlined in red have the highest values within their column. Note, number of clusters includes a cluster for outliers.

161 **Supplemental Tables**

| Race     | Cluster | OR    | log10(OR) | p-value   | Number of Women   |                       |                       |                           |
|----------|---------|-------|-----------|-----------|-------------------|-----------------------|-----------------------|---------------------------|
|          |         |       |           |           | Race & In Cluster | Not Race & In Cluster | Race & Not In Cluster | Not Race & Not In Cluster |
| WHITE    | 1       | 0.853 | -0.069    | 0.5072080 | 68                | 34                    | 1,503                 | 641                       |
| WHITE    | 2       | 1.074 | 0.031     | 0.6356394 | 213               | 86                    | 1,358                 | 589                       |
| WHITE    | 3       | 1.064 | 0.027     | 0.8322583 | 79                | 32                    | 1,492                 | 643                       |
| WHITE    | 4       | 0.757 | -0.121    | 0.0972683 | 108               | 60                    | 1,463                 | 615                       |
| WHITE    | 5       | 1.242 | 0.094     | 0.0220511 | 673               | 254                   | 898                   | 421                       |
| WHITE    | 6       | 0.848 | -0.071    | 0.1111089 | 420               | 203                   | 1,151                 | 472                       |
| AA       | 1       | 1.246 | 0.096     | 0.3672195 | 23                | 79                    | 406                   | 1,738                     |
| AA       | 2       | 0.972 | -0.012    | 0.9370306 | 56                | 243                   | 373                   | 1,574                     |
| AA       | 3       | 1.246 | 0.095     | 0.3853035 | 25                | 86                    | 404                   | 1,731                     |
| AA       | 4       | 0.798 | -0.098    | 0.3581256 | 27                | 141                   | 402                   | 1,676                     |
| AA       | 5       | 0.976 | -0.011    | 0.8276443 | 175               | 752                   | 254                   | 1,065                     |
| AA       | 6       | 1.000 | 0.000     | 1.0000000 | 119               | 504                   | 310                   | 1,313                     |
| ASIAN    | 1       | 0.925 | -0.034    | 1.0000000 | 3                 | 99                    | 68                    | 2,076                     |
| ASIAN    | 2       | 0.593 | -0.227    | 0.2861020 | 6                 | 293                   | 65                    | 1,882                     |
| ASIAN    | 3       | 0.268 | -0.572    | 0.2594471 | 1                 | 110                   | 70                    | 2,065                     |
| ASIAN    | 4       | 1.147 | 0.060     | 0.6497255 | 6                 | 162                   | 65                    | 2,013                     |
| ASIAN    | 5       | 1.398 | 0.146     | 0.1783888 | 35                | 892                   | 36                    | 1,283                     |
| ASIAN    | 6       | 1.022 | 0.010     | 0.8937709 | 20                | 603                   | 51                    | 1,572                     |
| HISPANIC | 1       | 1.008 | 0.003     | 1.0000000 | 8                 | 94                    | 167                   | 1,977                     |
| HISPANIC | 2       | 1.038 | 0.016     | 0.8176980 | 24                | 275                   | 151                   | 1,796                     |
| HISPANIC | 3       | 0.665 | -0.177    | 0.4656009 | 6                 | 105                   | 169                   | 1,966                     |
| HISPANIC | 4       | 2.497 | 0.397     | 0.0002320 | 27                | 141                   | 148                   | 1,930                     |
| HISPANIC | 5       | 0.452 | -0.345    | 0.0000044 | 44                | 883                   | 131                   | 1,188                     |
| HISPANIC | 6       | 1.560 | 0.193     | 0.0082143 | 64                | 559                   | 111                   | 1,512                     |

162  
163  
164  
165  
166  
167  
168

**Table S1: Enrichment of race per cluster in the held-out cohort for the model predicting preterm birth by 28 weeks of gestation.** We calculated enrichment (Odds Ratio, OR) for each cluster using Fisher’s exact test on the contingency table of number of women based on race (Race, Not Race) and cluster membership. The cohort was the held-out set used to evaluate the preterm birth prediction at 28 weeks of gestation.

| Risk Factor  | Cluster | OR     | log10(OR) | p-value  | Number of Women |            |                |                |
|--------------|---------|--------|-----------|----------|-----------------|------------|----------------|----------------|
|              |         |        |           |          | High Risk &     | Low Risk & | High Risk &    | Low Risk &     |
|              |         |        |           |          | In Cluster      | In Cluster | Not In Cluster | Not In Cluster |
| cerv_abnml   | 1       | 2.022  | 0.306     | 2.81E-01 | 2               | 100        | 21             | 2,123          |
| cerv_abnml   | 2       | 0.618  | -0.209    | 7.59E-01 | 2               | 297        | 21             | 1,926          |
| cerv_abnml   | 3       | 0.873  | -0.059    | 1.00E+00 | 1               | 110        | 22             | 2,113          |
| cerv_abnml   | 4       | 4.490  | 0.652     | 5.53E-03 | 6               | 162        | 17             | 2,061          |
| cerv_abnml   | 5       | 0.499  | -0.302    | 2.00E-01 | 6               | 921        | 17             | 1,302          |
| cerv_abnml   | 6       | 0.919  | -0.037    | 1.00E+00 | 6               | 617        | 17             | 1,606          |
| gest_dm      | 1       | 2.065  | 0.315     | 7.56E-03 | 22              | 80         | 252            | 1,892          |
| gest_dm      | 2       | 0.534  | -0.272    | 5.69E-03 | 22              | 277        | 252            | 1,695          |
| gest_dm      | 3       | 9.330  | 0.970     | 2.25E-25 | 57              | 54         | 217            | 1,918          |
| gest_dm      | 4       | 1.634  | 0.213     | 2.66E-02 | 30              | 138        | 244            | 1,834          |
| gest_dm      | 5       | 0.727  | -0.138    | 1.84E-02 | 95              | 832        | 179            | 1,140          |
| gest_dm      | 6       | 0.502  | -0.299    | 1.94E-05 | 47              | 576        | 227            | 1,396          |
| gest_htn     | 1       | 1.686  | 0.227     | 1.60E-01 | 8               | 94         | 103            | 2,041          |
| gest_htn     | 2       | 0.233  | -0.632    | 8.24E-04 | 4               | 295        | 107            | 1,840          |
| gest_htn     | 3       | 26.425 | 1.422     | 9.06E-39 | 49              | 62         | 62             | 2,073          |
| gest_htn     | 4       | 1.097  | 0.040     | 7.13E-01 | 9               | 159        | 102            | 1,976          |
| gest_htn     | 5       | 0.419  | -0.378    | 6.66E-05 | 26              | 901        | 85             | 1,234          |
| gest_htn     | 6       | 0.392  | -0.406    | 4.40E-04 | 15              | 608        | 96             | 1,527          |
| (pre)eclam   | 1       | 2.245  | 0.351     | 1.26E-02 | 13              | 89         | 131            | 2,013          |
| (pre)eclam   | 2       | 0.989  | -0.005    | 1.00E+00 | 19              | 280        | 125            | 1,822          |
| (pre)eclam   | 3       | 3.564  | 0.552     | 1.32E-05 | 20              | 91         | 124            | 2,011          |
| (pre)eclam   | 4       | 0.918  | -0.037    | 1.00E+00 | 10              | 158        | 134            | 1,944          |
| (pre)eclam   | 5       | 0.957  | -0.019    | 8.61E-01 | 58              | 869        | 86             | 1,233          |
| (pre)eclam   | 6       | 0.476  | -0.323    | 9.91E-04 | 23              | 600        | 121            | 1,502          |
| sickle_cell  | 1       | 0.000  |           | 1.00E+00 | -               | 102        | 20             | 2,124          |
| sickle_cell  | 2       | 0.341  | -0.468    | 5.04E-01 | 1               | 298        | 19             | 1,928          |
| sickle_cell  | 3       | 2.158  | 0.334     | 2.60E-01 | 2               | 109        | 18             | 2,117          |
| sickle_cell  | 4       | 2.204  | 0.343     | 1.84E-01 | 3               | 165        | 17             | 2,061          |
| sickle_cell  | 5       | 0.607  | -0.217    | 3.66E-01 | 6               | 921        | 14             | 1,305          |
| sickle_cell  | 6       | 1.746  | 0.242     | 2.17E-01 | 8               | 615        | 12             | 1,611          |
| delivery_age | 1       | 1.832  | 0.263     | 1.09E-02 | 28              | 74         | 367            | 1,777          |
| delivery_age | 2       | 1.238  | 0.093     | 1.66E-01 | 61              | 238        | 334            | 1,613          |
| delivery_age | 3       | 1.796  | 0.254     | 1.03E-02 | 30              | 81         | 365            | 1,770          |
| delivery_age | 4       | 2.197  | 0.342     | 2.11E-05 | 51              | 117        | 344            | 1,734          |
| delivery_age | 5       | 0.694  | -0.158    | 1.61E-03 | 135             | 792        | 260            | 1,059          |
| delivery_age | 6       | 0.693  | -0.159    | 5.29E-03 | 87              | 536        | 308            | 1,315          |
| diabetes     | 1       | 1.494  | 0.174     | 3.56E-01 | 4               | 98         | 57             | 2,087          |
| diabetes     | 2       | 0.215  | -0.667    | 1.28E-02 | 2               | 297        | 59             | 1,888          |
| diabetes     | 3       | 81.819 | 1.913     | 8.17E-48 | 44              | 67         | 17             | 2,118          |
| diabetes     | 4       | 1.108  | 0.044     | 8.03E-01 | 5               | 163        | 56             | 2,022          |
| diabetes     | 5       | 0.096  | -1.018    | 1.04E-09 | 4               | 923        | 57             | 1,262          |
| diabetes     | 6       | 0.085  | -1.069    | 7.75E-07 | 2               | 621        | 59             | 1,564          |
| fetal_abnl   | 1       | 8.535  | 0.931     | 2.07E-10 | 19              | 83         | 56             | 2,088          |
| fetal_abnl   | 2       | 0.662  | -0.179    | 3.87E-01 | 7               | 292        | 68             | 1,879          |
| fetal_abnl   | 3       | 2.046  | 0.311     | 9.47E-02 | 7               | 104        | 68             | 2,067          |
| fetal_abnl   | 4       | 2.205  | 0.343     | 2.41E-02 | 11              | 157        | 64             | 2,014          |
| fetal_abnl   | 5       | 0.375  | -0.426    | 2.96E-04 | 16              | 911        | 59             | 1,260          |
| fetal_abnl   | 6       | 0.537  | -0.270    | 4.82E-02 | 13              | 610        | 62             | 1,561          |
| prepreg_bp   | 1       | 1.304  | 0.115     | 2.23E-01 | 54              | 48         | 993            | 1,151          |
| prepreg_bp   | 2       | 0.714  | -0.146    | 8.85E-03 | 118             | 181        | 929            | 1,018          |
| prepreg_bp   | 3       | 2.720  | 0.435     | 7.86E-07 | 77              | 34         | 970            | 1,165          |
| prepreg_bp   | 4       | 1.072  | 0.030     | 6.88E-01 | 81              | 87         | 966            | 1,112          |
| prepreg_bp   | 5       | 0.771  | -0.113    | 2.64E-03 | 397             | 530        | 650            | 669            |
| prepreg_bp   | 6       | 1.256  | 0.099     | 1.60E-02 | 316             | 307        | 731            | 892            |



|             |   |       |        |          |     |     |     |       |
|-------------|---|-------|--------|----------|-----|-----|-----|-------|
| prepreg_bmi | 1 | 1.203 | 0.080  | 3.63E-01 | 52  | 50  | 994 | 1,150 |
| prepreg_bmi | 2 | 0.541 | -0.267 | 2.00E-06 | 101 | 198 | 945 | 1,002 |
| prepreg_bmi | 3 | 2.850 | 0.455  | 2.65E-07 | 78  | 33  | 968 | 1,167 |
| prepreg_bmi | 4 | 1.390 | 0.143  | 4.43E-02 | 91  | 77  | 955 | 1,123 |
| prepreg_bmi | 5 | 0.762 | -0.118 | 1.71E-03 | 395 | 532 | 651 | 668   |
| prepreg_bmi | 6 | 1.317 | 0.119  | 3.94E-03 | 321 | 302 | 725 | 898   |

169

170

171

172

173

174

175

**Table S2: Enrichment of clinical risk factors per cluster in the held-out cohort for the model predicting preterm birth by 28 weeks of gestation.** We calculated enrichment (Odds Ratio, OR) for each cluster using Fisher's exact test on the contingency table of the number of women based on clinical risk factor status (High-Risk, Low-Risk) and cluster membership (Methods). The cohort was the held-out set used to evaluate the model predicting preterm birth at 28 weeks of gestation.

| icd9   | shap    | icd9   | shap    | icd9   | shap    | icd9   | shap    | icd9   | shap    | icd9   | shap    |
|--------|---------|--------|---------|--------|---------|--------|---------|--------|---------|--------|---------|
| V22.1  | 2.2E-01 | 311    | 6.4E-03 | 780.79 | 2.8E-03 | 367.1  | 1.5E-03 | 959.4  | 8.8E-04 | 719.46 | 4.9E-04 |
| V22.0  | 2.0E-01 | 216.5  | 6.4E-03 | 786.2  | 2.8E-03 | 620.1  | 1.5E-03 | 795.05 | 8.6E-04 | 780.4  | 4.8E-04 |
| 655.83 | 1.2E-01 | V74.1  | 6.2E-03 | 706.1  | 2.8E-03 | 789.06 | 1.5E-03 | 304    | 8.6E-04 | V15.81 | 4.8E-04 |
| V28.81 | 8.6E-02 | 626.4  | 6.1E-03 | V15.89 | 2.8E-03 | V25.01 | 1.4E-03 | 883    | 8.6E-04 | 714    | 4.5E-04 |
| V28.3  | 6.5E-02 | 641.03 | 6.1E-03 | 462    | 2.8E-03 | 704.8  | 1.4E-03 | 626.1  | 8.6E-04 | 659.71 | 4.5E-04 |
| V77.1  | 3.1E-02 | 276.51 | 6.1E-03 | 641.01 | 2.8E-03 | V06.8  | 1.4E-03 | V72.2  | 8.4E-04 | 656.23 | 4.1E-04 |
| 644.03 | 3.1E-02 | 626    | 5.9E-03 | 486    | 2.6E-03 | 789.59 | 1.4E-03 | 728.85 | 8.4E-04 | V25.8  | 4.1E-04 |
| V23.41 | 3.0E-02 | V72.42 | 5.9E-03 | V67.09 | 2.6E-03 | 789.04 | 1.4E-03 | 628.9  | 8.2E-04 | 789.05 | 3.9E-04 |
| V76.2  | 2.6E-02 | 789.09 | 5.3E-03 | 309.81 | 2.6E-03 | 655.91 | 1.4E-03 | 709.09 | 8.2E-04 | 788.41 | 3.7E-04 |
| 642.03 | 2.5E-02 | V72.40 | 5.3E-03 | 789.01 | 2.6E-03 | 794.5  | 1.4E-03 | 34     | 8.1E-04 | 790.6  | 3.3E-04 |
| 648.03 | 2.5E-02 | V23.82 | 5.0E-03 | 616.1  | 2.5E-03 | 655.93 | 1.4E-03 | 309.28 | 8.0E-04 | 304.01 | 3.2E-04 |
| V28.89 | 2.4E-02 | 787.01 | 5.0E-03 | 656.73 | 2.5E-03 | 564    | 1.3E-03 | 466    | 7.9E-04 | V71.89 | 2.9E-04 |
| 282.9  | 2.3E-02 | 623.5  | 5.0E-03 | 256.4  | 2.4E-03 | 789.03 | 1.3E-03 | 520.6  | 7.9E-04 | 780.39 | 2.6E-04 |
| 401.9  | 2.3E-02 | 795.01 | 4.9E-03 | 658.13 | 2.3E-03 | 783.21 | 1.3E-03 | 276.2  | 7.9E-04 | 786.59 | 2.2E-04 |
| 656.53 | 2.1E-02 | 278    | 4.7E-03 | 724.2  | 2.3E-03 | 296.9  | 1.3E-03 | 719.41 | 7.4E-04 | 648.01 | 2.0E-04 |
| V72.31 | 1.9E-02 | 648.81 | 4.6E-03 | 641.13 | 2.3E-03 | 648.33 | 1.3E-03 | 654.53 | 7.2E-04 | 478    | 1.7E-04 |
| 642.23 | 1.9E-02 | 465.9  | 4.5E-03 | 648.31 | 2.3E-03 | 977.9  | 1.3E-03 | 729.5  | 7.2E-04 | 250.02 | 1.4E-04 |
| 648.93 | 1.9E-02 | 787.02 | 4.2E-03 | 659.61 | 2.2E-03 | E917.9 | 1.2E-03 | 626.8  | 7.1E-04 | V23.7  | 9.8E-05 |
| V23.89 | 1.8E-02 | V70.0  | 4.2E-03 | 719.45 | 2.2E-03 | 642.01 | 1.2E-03 | 655.01 | 7.0E-04 |        |         |
| 649.73 | 1.7E-02 | V25.09 | 4.1E-03 | 787.91 | 2.1E-03 | V26.49 | 1.2E-03 | 595    | 6.9E-04 |        |         |
| 625.9  | 1.6E-02 | 790.29 | 4.0E-03 | 634.92 | 2.1E-03 | 786.05 | 1.2E-03 | 648    | 6.9E-04 |        |         |
| 649.13 | 1.6E-02 | 655.13 | 3.8E-03 | 719.47 | 2.1E-03 | 461.9  | 1.2E-03 | 610.1  | 6.9E-04 |        |         |
| V28.9  | 1.5E-02 | 244.9  | 3.8E-03 | 655.73 | 2.1E-03 | V67.00 | 1.2E-03 | 719.44 | 6.7E-04 |        |         |
| 250.01 | 1.5E-02 | 780.2  | 3.8E-03 | V45.89 | 2.1E-03 | 782.3  | 1.2E-03 | 648.91 | 6.7E-04 |        |         |
| 640.83 | 1.4E-02 | 477    | 3.8E-03 | 79.99  | 2.1E-03 | 813.42 | 1.1E-03 | 796.5  | 6.7E-04 |        |         |
| 655.03 | 1.3E-02 | 642.91 | 3.7E-03 | 737.3  | 2.1E-03 | V58.69 | 1.1E-03 | 790.22 | 6.7E-04 |        |         |
| 648.83 | 1.3E-02 | 250.03 | 3.7E-03 | 632    | 2.0E-03 | 305.1  | 1.1E-03 | 648.23 | 6.7E-04 |        |         |
| 654.23 | 1.2E-02 | 796.2  | 3.7E-03 | 285.9  | 1.9E-03 | 54.9   | 1.1E-03 | 729.81 | 6.6E-04 |        |         |
| 640.03 | 1.2E-02 | 640.93 | 3.6E-03 | 626.9  | 1.9E-03 | V05.9  | 1.1E-03 | 238.2  | 6.5E-04 |        |         |
| V27.0  | 1.2E-02 | 382.9  | 3.6E-03 | 620.2  | 1.9E-03 | 427.89 | 1.1E-03 | V70.7  | 6.4E-04 |        |         |
| 692.9  | 1.1E-02 | 655.81 | 3.6E-03 | 648.43 | 1.9E-03 | 611.72 | 1.1E-03 | 643.03 | 6.3E-04 |        |         |
| 782.1  | 1.1E-02 | V20.2  | 3.5E-03 | 795.03 | 1.9E-03 | V58.67 | 1.1E-03 | 305    | 6.3E-04 |        |         |
| 623.8  | 1.1E-02 | 616    | 3.5E-03 | 724.5  | 1.8E-03 | V72.83 | 1.1E-03 | 521    | 6.3E-04 |        |         |
| V74.5  | 1.0E-02 | 649.03 | 3.4E-03 | 845    | 1.8E-03 | 530.81 | 1.1E-03 | 478.19 | 6.1E-04 |        |         |
| 658.03 | 9.5E-03 | 788.1  | 3.4E-03 | 493.9  | 1.8E-03 | 473.9  | 1.0E-03 | 782    | 6.1E-04 |        |         |
| 659.63 | 9.2E-03 | V23.9  | 3.4E-03 | 641.93 | 1.7E-03 | 558.9  | 1.0E-03 | 218.9  | 5.9E-04 |        |         |
| V23.5  | 8.7E-03 | 658.01 | 3.4E-03 | 959.7  | 1.7E-03 | 780.5  | 1.0E-03 | 296.2  | 5.8E-04 |        |         |
| V22.2  | 8.6E-03 | 784    | 3.3E-03 | 620.8  | 1.7E-03 | 706.2  | 1.0E-03 | 698.1  | 5.8E-04 |        |         |
| 646.83 | 8.3E-03 | 795.07 | 3.2E-03 | 477.8  | 1.7E-03 | 659.53 | 1.0E-03 | 280    | 5.6E-04 |        |         |
| V04.81 | 8.3E-03 | 642.93 | 3.2E-03 | 646.63 | 1.6E-03 | 646.81 | 1.0E-03 | 401.1  | 5.4E-04 |        |         |
| 789    | 8.3E-03 | 786.5  | 3.2E-03 | 346.9  | 1.6E-03 | 924.9  | 1.0E-03 | 611.71 | 5.3E-04 |        |         |
| 278.01 | 7.9E-03 | 286.9  | 3.2E-03 | 656.51 | 1.6E-03 | V25.49 | 9.8E-04 | 622.11 | 5.3E-04 |        |         |
| V25.42 | 7.9E-03 | 649.53 | 3.2E-03 | V15.85 | 1.6E-03 | 218.1  | 9.8E-04 | 296.31 | 5.3E-04 |        |         |
| 599    | 7.8E-03 | 112.1  | 3.1E-03 | 477.9  | 1.6E-03 | 625    | 9.6E-04 | V72.84 | 5.2E-04 |        |         |
| V23.49 | 7.2E-03 | 649.11 | 3.0E-03 | 659.73 | 1.6E-03 | V65.49 | 9.5E-04 | 644.1  | 5.2E-04 |        |         |
| 250    | 7.0E-03 | 649.63 | 3.0E-03 | 646.23 | 1.5E-03 | 795.04 | 9.4E-04 | 300.01 | 5.2E-04 |        |         |
| 654.43 | 6.7E-03 | V28.4  | 2.9E-03 | 276.8  | 1.5E-03 | 785    | 9.0E-04 | 611.79 | 5.1E-04 |        |         |
| V72.9  | 6.5E-03 | 780.6  | 2.9E-03 | 787.03 | 1.5E-03 | 656.63 | 8.9E-04 | 786.09 | 5.0E-04 |        |         |
| 654.13 | 6.4E-03 | 648.13 | 2.8E-03 | 648.63 | 1.5E-03 | V77.91 | 8.9E-04 | 626.2  | 5.0E-04 |        |         |

176  
177  
178  
179  
180  
181

**Table S3: All features (ICD-9 codes) used to predict preterm birth at 28 weeks using Vanderbilt cohort.** We report the mean absolute SHAP value ('shap') across women in the held-out set for ICD-9 codes ('icd9') used to predict preterm birth at 28 weeks of gestation in the Vanderbilt cohort. Features with zero mean absolute SHAP value are not reported in the table.

182  
183  
184  
185  
186  
187  
188  
189  
190  
191  
192  
193  
194  
195  
196  
197  
198  
199  
200  
201  
202  
203  
204  
205  
206  
207  
208  
209  
210  
211  
212  
213  
214  
215  
216  
217  
218  
219  
220  
221  
222  
223  
224  
225  
226  
227  
228

## Supplementary Materials and Methods

### Delivery-specific ICD-9/10 codes used to ascertain delivery type.

The following ICD-9/10 codes were used to ascertain delivery type as described in the Methods section.

- Preterm Birth: 'O60.1 ', 'O60.10', 'O60.10X0', 'O60.10X1', 'O60.10X2', 'O60.10X3', 'O60.10X4', 'O60.10X5', 'O60.10X9', 'O60.12', 'O60.12X0', 'O60.12X1', 'O60.12X2', 'O60.12X3', 'O60.12X4', 'O60.12X5', 'O60.12X9', 'O60.13', 'O60.13X0', 'O60.13X1', 'O60.13X2', 'O60.13X3', 'O60.13X4', 'O60.13X5', 'O60.13X9', 'O60.14', 'O60.14X0', 'O60.14X1', 'O60.14X2', 'O60.14X3', 'O60.14X4', 'O60.14X5', 'O60.14X9', '644.2', '644.20', '644.21'
- Term Birth: 'O60.20', 'O60.20X0', 'O60.20X1', 'O60.20X2', 'O60.20X3', 'O60.20X4', 'O60.20X5', 'O60.20X9', 'O60.22', 'O60.22X0', 'O60.22X1', 'O60.22X2', 'O60.22X3', 'O60.22X4', 'O60.22X5', 'O60.22X9', 'O60.23', 'O60.23X0', 'O60.23X1', 'O60.23X2', 'O60.23X3', 'O60.23X4', 'O60.23X5', 'O60.23X9', 'O80', 'O48.0', '650', '645.1', '645.10', '645.11', '645.13', '649.8', '649.81', '649.82'
- Postterm Birth: 'O48.1', '645.2', '645.20', '645.21', '645.23', '645.00', '645.01', '645.03'

### Delivery-specific CPT codes used to ascertain delivery type.

The following CPT codes were used to ascertain delivery date: '59400', '59409', '59410', '59414', '59510', '59514', '59515', '59525', '59610', '59612', '59614', '59618', '59620', '59622'.

### Identifying multiple gestations using billing codes.

Pregnancies with multiple gestations were identified using the presence of any of the following billing codes. For singleton only analyses, we excluded women with multiple gestation.

- ICD-9 Multiple Gestations:  
'651', '651.7', '651.70', '651.71', '651.8', '651.81', '651.83', '651.9', '651.91', '651.93', '652.6', '652.60', '652.61', '652.63', 'V91', 'V91.9', 'V91.90', 'V91.91', 'V91.92', 'V91.99', '651', '651.0', '651.00', '651.01', '651.03', '651.1', '651.10', '651.11', '651.13', '651.2', '651.20', '651.21', '651.23', '651.3', '651.30', '651.31', '651.33', '651.4', '651.40', '651.41', '651.43', '651.5', '651.50', '651.51', '651.53', 'V91', 'V91.0', 'V91.00', 'V91.01', 'V91.02', 'V91.03', 'V91.09', 'V91.1', 'V91.10', 'V91.11', 'V91.12', 'V91.19', 'V91.2', 'V91.20', 'V91.21', 'V91.22', 'V91.29', 'V91.9', 'V91.90', 'V91.91', 'V91.92', 'V91.99'
- CPT Twin codes: '74713', '76802', '76810', '76812', '76814'
- ICD-10 Multiple Gestations:  
'BY4BZZZ', 'BY4DZZZ', 'BY4GZZZ', 'O30.801', 'O30.802', 'O30.803', 'O30.809', 'O30.811', 'O30.812', 'O30.813', 'O30.819', 'O30.821', 'O30.822', 'O30.823', 'O30.829', 'O30.891', 'O30.892', 'O30.893', 'O30.899', 'O30.91', 'O30.92', 'O30.93', 'O31.BX10', 'O31.BX11', 'O31.BX12', 'O31.BX13', 'O31.BX14', 'O31.BX15', 'O31.BX19', 'O31.BX20', 'O31.BX21', 'O31.BX22', 'O31.BX23', 'O31.BX24', 'O31.BX25', 'O31.BX29', 'O31.BX30', 'O31.BX31', 'O31.BX32', 'O31.B

229 X33','O31.BX34','O31.BX35','O31.BX39','O31.BX90','O31.BX91','O31.BX92','O31.BX  
230 93','O31.BX94','O31.BX95','O31.BX99'

231  
232

233 Past medical and family history extracted from EHRs used to predict preterm birth.

234 The following past medical and family history features were extracted from EHRs for women  
235 with at least one recorded delivery at Vanderbilt Hospital.

236

237 • Maternal History:

238 'Abortion', 'Alcohol ', 'Baby's father had a child with birth defect not listed', 'Baby's father's  
239 family has history of birth defect not listed', 'Drugs ', 'Endocrine Metabolic Patient ', 'Endocrine  
240 metaboloic Patient History ', 'Gravidity', 'Hematologic ', 'Maternal metabolic or endocrine  
241 disorders (Diabetes, PKU) ', 'Menses every 28 to 30 days ', 'Patient History Breast Disease ',  
242 'Patient History Congenital Heart Defect ', 'Patient History Cystic Fibrosis ', 'Patient History  
243 Down Syndrome ', 'Patient History GI Problems ', 'Patient History Genetic other', 'Patient History  
244 Gyn Problems ', 'Patient History Heart Disease ', 'Patient History Hemophilia or other blood  
245 disorders ', 'Patient History Huntington's Chorea ', 'Patient History Hypertension ', 'Patient  
246 History Immune or Infectious Disease ', 'Patient History Infertility or Recurrent Spontaneous  
247 Abortions ', 'Patient History Malignancies ', 'Patient History Mental Retardation ', 'Patient  
248 History Multiple births ', 'Patient History Muscular Dystrophy ', 'Patient History Neural Tube  
249 Defect ', 'Patient History Neurological Disorder ', 'Patient History Operations or Accidents ',  
250 'Patient History Other Hospitalizations ', 'Patient History Other ', 'Patient History Other inherited  
251 or chromosomal disorders ', 'Patient History Other structural Birth defect ', 'Patient History  
252 Phlebitis or varicocities ', 'Patient History Pulmonary Disease ', 'Patient History Recurrent  
253 Pregnancy loss defined as more than 2 or stillbirth', 'Patient History STDs ', 'Patient History  
254 Sickle Cell Disease (African or Carribean American) ', 'Patient History Thalessemia (Italian,  
255 Greek, Mediterranean, or Asian Background); MCV <80 ', 'Patient History Tobacco, Alcohol,  
256 Drugs ', 'Patient History Urinary tract problems including UTIs and Pyel ', 'Patient History of  
257 Seizure', 'Patient History of sexual/physical abuse or trauma ', 'Patient's age greater than 34 at  
258 delivery ', 'Pregnancy Induced Hypertension', 'Prior Preterm\_births', 'Regular exercise ',  
259 'Term\_births', 'Tobacco ', 'Urinary tract infection', 'Live\_Children'

260

261 • Family History:

262 'Familly History Thalessemia (Italian, Greek, Mediterranean, or Asian Background); MCV <80 ',  
263 'Family History Breast Disease ', 'Family History Congenital Heart Defect ', 'Family History  
264 Cystic Fibrosis ', 'Family History Down Syndrome ', 'Family History GI Problems ', 'Family  
265 History Genetic other', 'Family History Gyn Problems ', 'Family History Heart Disease ', 'Family  
266 History Hemophilia or other blood disorders ', 'Family History Huntington's Chorea ', 'Family  
267 History Hypertension ', 'Family History Immune or Infectious Disease ', 'Family History  
268 Infertility or Recurrent Spontaneous Abortions ', 'Family History Jewish, Cajun, French  
269 Canadian (Tay Sachs) ', 'Family History Jewish: Canavan Disease, Gauchers ', 'Family History  
270 Malignancies ', 'Family History Mental Retardation ', 'Family History Metabolic or endocrine  
271 disorders (Diabetes, PKU) ', 'Family History Multiple births ', 'Family History Muscular  
272 Dystrophy ', 'Family History Neural Tube Defect ', 'Family History Neurologigal Disorder ',  
273 'Family History Operations or Accidents ', 'Family History Other Hospitalizations ', 'Family  
274 History Other ', 'Family History Other inherited or chromosomal disorders ', 'Family History

275 Other structural Birth defect ', 'Family History Phlebitis or varicocities ', 'Family History  
276 Pulmonary Disease ', 'Family History Recurrent Pregnancy loss defined as more than 2 or  
277 stillbirth', 'Family History STDs ', 'Family History Sickle Cell Disease (African or Carribean  
278 American) ', 'Family History Tobacco, Alcohol, Drugs ', 'Family History Urinary tract problems  
279 including UTIs and Pyel ', 'Family History of Seizure', 'Family History of sexual/physical abuse  
280 or trauma ', 'Jewish, Cajun, French Canadian (Tay Sachs) ', 'Jewish: Canavan Disease, Gauchers'  
281

282 Clinical labs measured during pregnancy used to predict preterm birth  
283

284 'albumin urine, lactic acid venous, cd3 #/cumm, total protein urine, glucose blood, wbc blood, eo  
285 automated abs, atyp lymphs (abs), reaction time, lmw heparin assay, rdwsd, glucose spinal fluid,  
286 control ptt, rbc folate, calcium blood, gentamicin level, urea nitrogen ur spot, mch, aldosterone,  
287 magnesium blood, mchc, factor viii activity, sodium blood, igg quantitative blood, bicarbonate  
288 (calc), hcg beta (3rd irp), dhea sulfate, hdl cholesterol, protein csf, f t4, alt blood, neutrophil %,  
289 k-time, metamyelo %, estriol unconjugated, sodium urine spot, cellano antigen, icterus index,  
290 nucleated rbc, protein total blood, eosinophil (abs), erythropoietin, neutrophils %, immature  
291 retic fraction, zinc serum, c-peptide, imm granulocytes %, lipemia index, monocytes %, ssb  
292 (la)(ena) ab, igg, beta-hcg serum, protein urine, bedside glucose, troponin t, intact-pth, sm  
293 (smith) autoabs eia, ferritin, absolute cd8, sex hormone bind globulin, eosinophils %, protein c  
294 activity, cd8(cd3+)/cd45 #/cumm, glucose tol 50g, basophils %, wbc, albumin, mcv, gamma  
295 globulin, testosterone free, fio2, lymph %, pan t cd3 %, troponin-i, mono (abs), rheumatoid  
296 factor, quant d-dimer for dic, pcv blood, hgb a1c glycated poc, 25-hydroxy d3, eosinophil (abs),  
297 carboxyhemoglobin, urea nitrogen blood, hgb a1c glycated, cholesterol blood, lamotrigine,  
298 cystatin-c, carbon dioxide blood, apa-igg, neutrophils %, myelocytes %, hdl cholesterol, vit  
299 e(alpha-tocopherol), glucose whole blood, calcium ionized, gamma glut trans blood, follicle  
300 stimulating hrm, total hemoglb, creatinine g/24 hour, atyp lymphs %, wbc urine micro, nt  
301 automated abs, chloride blood, imm platelet fraction, fasting glucose, po2/fio2, sodium whole  
302 blood, ast blood, albumin/creatinine ratio, angle(alpha), rbc, vit d 1,25-dihydroxy, c3 quantitative  
303 blood, lymphs (abs), ldl cholesterol, triglycerides blood, testosterone, ed troponin-i wbld, o2  
304 saturation, creatinine urine per day, triiodothyronine free, eosinophil %, rbc, rbc urine micro,  
305 thyroid stim hormone, anti-myeloperoxidase, c-reactive protein, deamidated gliadin iga abs,  
306 hyaline cast, ammonia, igg beta 2 glycoprotein i, progesterone rapid, vitamin d 25-oh total, t  
307 helper cd4 #/cumm, patient (pt), schedule q hr, keppra (levetiracetam), creatine kinase total,  
308 maternal alphafeto pr0, creatinine urine "spot", ret ct, creatinine urine "timed", specific gravity  
309 ua, iron blood, kappa light chain quant, lithium blood, 2 hour glucose, vancomycin level, anion  
310 gap, luteinizing hormone, iga quantitative blood, phenytoin (dilantin), methemoglobin, alpha-1  
311 globulin, thyroglobulin serum, renin activity, c4 quantitative blood, rdw, urobilinogen, maternal  
312 weight, venous ph, % cd3, protein urine spot, carbamazepine (tegretol), hep b surface ab value,  
313 anti-protease 3, hemoglobin s, sed rate, amylase blood, ssa (ro)(ena) ab, igg, 25-hydroxy d total,  
314 total gamma globulin, adrenocorticotrophic horm, retic hgb equiv, neut (abs), insulin, albumin,  
315 lymphs %, antithrombin iii act, myelocytes (abs), lymps %, nucleated rbc, alkaline phosphatase  
316 bld, # wbc\'s counted, fibrinogen, ed creatinine wbld, ph arterial, metamyelocytes (abs),  
317 kappa/lambda ratio, ret abs, beta globulin, basophils %, albumin blood, ed inr wbld, anti thyroid  
318 peroxab, tc:hdl ratio, afp tumor, vitamin a (retinol), albumin/creat ratio, patient location, ck-mb  
319 ratio, total volume, total t4, creatinine blood, absolute cd3, collection time, current gest age, apa-  
320 igm, ck blood, hemoglobin blood, max amplitude, transferrin blood, cd8(cd3+)/cd45 %, cd4:cd8

321 ratio, monocytes %, protein urine timed, beta globulin, dose, % cd8, estradiol, nucleated rbc#,  
322 cortisol, prolactin, lymphs (abs), granular cast, protein-s-activity, pcv blood, mono (abs), brain  
323 natriuretic peptide, fk-506 (tacrolimus), bilirubin conjugated, bilirubin total blood, chloride  
324 whole blood, 25-hydroxy d2, hemoglobin a, haptoglobin blood, folate serum, ck-mb, glucose  
325 urine, nucleated cell, absolute cd4, baso (abs), creatinine urine, scl-70 autoabs eia, infusion start  
326 time, squamous epithelial, g parameter, osmolality blood, baso (abs), vitamin b-12, hours of  
327 collection, inr, lipase blood, hemoglobin a2, potassium urine spot, factor v leiden coag,  
328 phosphorus inorganic, percent saturation, valproate(depakane), ldh blood, anti-dna(sle)current,  
329 lambda light chain quant, bcrabl/bcr ratio, free phenytoin, t helper cd4 %, % cd4, mean platelet  
330 volume, creatinine urine, ketone urine, igm quantitative blood, patient ptt, glucose body fluid, vit  
331 e(gamma-tocopherol), igm beta 2 glycoprotein i, maternal b-hcg, drvvt, protein total blood, ph  
332 urine, lymph abs, alpha-2 globulin, retinyl palmitate, d-dimer (patient), lymphs %, o2 saturation  
333 (calc), uric acid blood, ldl cholesterol calc, non-hdl, triiodothyronine, total, testosterone free female,  
334 potassium whole blood, deamidated gliadin igg abs, urobilinogen, monocytes %, protein /24  
335 hour, neut (abs), tbc blood, apa-iga, platelet count, albumin urine, o2 saturation(venous,  
336 prealbumin blood, basophils %, eosinophil %  
337

### 338 Identifying cesarean section and vaginal deliveries.

339 The following ICD-9 and CPT codes were used to label deliveries as a cesarean section vs.  
340 vaginal deliveries. We excluded deliveries if they had codes for both types of deliveries.  
341

- 342 • Cesarean section: '669.7', '669.70', '669.71', '763.4', '74.0', '74.1', '74.2', '74.4',  
343 '74.9','74.99', '59510', '59514', '59515', '59618', '59620', '59622'
- 344 • Vaginal Deliveries: '59409', '59410', '59610', '59612', '59614'

### 347 Identifying spontaneous preterm births from electronic health records

348 From all preterm cases, we excluded women meeting any of the following criteria: medically  
349 induced labor, delivery by cesarean section, or preterm premature rupture of membranes. The  
350 following ICD-9 and CPT codes were used to identify these exclusion criteria.

- 351 • Medically induced labor: '73.01', '73.1', '73.4', '73.0', '73.09'
- 352 • Cesarean Section delivery: '669.7', '669.70', '669.71', '763.4', '74.0', '74.1', '74.2', '74.4',  
353 '74.9','74.99', '59510', '59514', '59515', '59618', '59620', '59622'
- 354 • Preterm premature rupture of membranes: '658.13','658.10','658.11'

### 357 Identifying clinical risk factors based on ICD-9 codes

358 Women with at least one ICD-9 code within each risk factor set was considered to be positive for  
359 that risk factor.  
360

361 Fetal abnormalities:

362 '655','655.01','655.03','655.1','655.1','655.11','655.13','655.3','655.31','655.33','655.4','655.41','655  
363 .43','655.5','655.5','655.51','655.53'

364 Sickle Cell Disease:  
365

366 '282.41','282.42','282.5','282.6','282.6','282.61','282.62','282.63','282.64','282.68','282.69'  
367  
368 Diabetes Codes:  
369 '250','250.01','250.02','250.03','250.1','250.11','250.12','250.13','250.2','250.21','250.22','250.23','2  
370 50.3','250.31','250.32','250.33','250.4','250.41','250.42','250.43','250.5','250.51','250.52','250.53','2  
371 50.6','250.61','250.62','250.63','250.7','250.71','250.72','250.73','250.8','250.81','250.82','250.83','2  
372 50.9','250.91','250.92','250.93'  
373  
374 Gestational Diabetes Codes:  
375 "648.0","648.00","649.1","648.01","649.1","648.02","649.1","648.03","649.1","648.04"  
376  
377 Gestational Hypertension Codes:  
378 "642","642.0","642.00","642.01","642.02","642.03","642.04","642.1","642.10","642.11","642.1  
379 2","642.13","642.14","642.2","642.20","642.21","642.22","642.23","642.24","642.3","642.30","  
380 642.31","642.32","642.33","642.34"  
381  
382  
383 Eclampsia or Preeclampsia Codes:  
384 "642.4","642.40","642.41","642.42","642.43","642.44","642.5","642.50","642.51","642.52","64  
385 2.53","642.54","642.6","642.60","642.61","642.62","642.63","642.64"  
386  
387 Cervical Abnormalities:  
388 "622.5", "654.5", "654.50","654.51","654.52","654.53","654."
